# Supplementary material for: AP003352.1/miR-141-3p axis enhances the proliferation of osteosarcoma by LPAR3
Source: PeerJ journal article supplement (doi:10.7717/peerj.15937), 2023-09-15
Supplement: original_data.zip [file original_data.zip]

## Sheet: Sheet1
	ASO NC			ASO lncRNA
AL358332.1	1	1.03003	0.970845	0.888843	0.926409	0.852799
AC124798.1	1	1.02731	0.973415	0.993092	1.05774	0.932398
LINC02280	1	1.02711	0.973609	1.10701	1.15669	1.05946
AP003352.1	1	1.02669	0.974	0.45376	0.470331	0.437772
AC073487.1	1	1.02229	0.9782	0.785612	0.721063	0.812656
AC084855.2	1	1.02314	0.977387	0.890899	0.938426	0.845779
Compare cell means regardless of rows and columns
Number of families	1
Number of comparisons per family	66
Alpha	0.05
Bonferroni's multiple comparisons test	Mean Diff.	95.00% CI of diff.	Significant?	Summary	Adjusted P Value
AL358332.1:ASO NC vs. AL358332.1:ASO lncRNA	0.1109	-0.005074 to 0.2270	No	ns	0.0763
AL358332.1:ASO NC vs. AC124798.1:ASO NC	5e-05	-0.1160 to 0.1161	No	ns	>0.9999
AL358332.1:ASO NC vs. AC124798.1:ASO lncRNA	0.005883	-0.1101 to 0.1219	No	ns	>0.9999
AL358332.1:ASO NC vs. LINC02280:ASO NC	5.333e-05	-0.1160 to 0.1161	No	ns	>0.9999
AL358332.1:ASO NC vs. LINC02280:ASO lncRNA	-0.1074	-0.2234 to 0.008587	No	ns	0.1021
AL358332.1:ASO NC vs. AP003352.1:ASO NC	6.067e-05	-0.1160 to 0.1161	No	ns	>0.9999
AL358332.1:ASO NC vs. AP003352.1:ASO lncRNA	0.5463	0.4303 to 0.6624	Yes	****	<0.0001
AL358332.1:ASO NC vs. AC073487.1:ASO NC	0.0001303	-0.1159 to 0.1161	No	ns	>0.9999
AL358332.1:ASO NC vs. AC073487.1:ASO lncRNA	0.2272	0.1112 to 0.3432	Yes	****	<0.0001
AL358332.1:ASO NC vs. AC084855.2:ASO NC	0.0001177	-0.1159 to 0.1161	No	ns	>0.9999
AL358332.1:ASO NC vs. AC084855.2:ASO lncRNA	0.1086	-0.007425 to 0.2246	No	ns	0.0927
AL358332.1:ASO lncRNA vs. AC124798.1:ASO NC	-0.1109	-0.2269 to 0.005124	No	ns	0.0766
AL358332.1:ASO lncRNA vs. AC124798.1:ASO lncRNA	-0.1051	-0.2211 to 0.01096	No	ns	0.1241
AL358332.1:ASO lncRNA vs. LINC02280:ASO NC	-0.1109	-0.2269 to 0.005127	No	ns	0.0767
AL358332.1:ASO lncRNA vs. LINC02280:ASO lncRNA	-0.2184	-0.3344 to -0.1024	Yes	****	<0.0001
AL358332.1:ASO lncRNA vs. AP003352.1:ASO NC	-0.1109	-0.2269 to 0.005134	No	ns	0.0767
AL358332.1:ASO lncRNA vs. AP003352.1:ASO lncRNA	0.4354	0.3194 to 0.5514	Yes	****	<0.0001
AL358332.1:ASO lncRNA vs. AC073487.1:ASO NC	-0.1108	-0.2268 to 0.005204	No	ns	0.0771
AL358332.1:ASO lncRNA vs. AC073487.1:ASO lncRNA	0.1162	0.0002244 to 0.2323	Yes	*	0.0491
AL358332.1:ASO lncRNA vs. AC084855.2:ASO NC	-0.1108	-0.2268 to 0.005191	No	ns	0.0771
AL358332.1:ASO lncRNA vs. AC084855.2:ASO lncRNA	-0.002351	-0.1184 to 0.1137	No	ns	>0.9999
AC124798.1:ASO NC vs. AC124798.1:ASO lncRNA	0.005833	-0.1102 to 0.1218	No	ns	>0.9999
AC124798.1:ASO NC vs. LINC02280:ASO NC	3.333e-06	-0.1160 to 0.1160	No	ns	>0.9999
AC124798.1:ASO NC vs. LINC02280:ASO lncRNA	-0.1075	-0.2235 to 0.008537	No	ns	0.1017
AC124798.1:ASO NC vs. AP003352.1:ASO NC	1.067e-05	-0.1160 to 0.1160	No	ns	>0.9999
AC124798.1:ASO NC vs. AP003352.1:ASO lncRNA	0.5463	0.4303 to 0.6623	Yes	****	<0.0001
AC124798.1:ASO NC vs. AC073487.1:ASO NC	8.033e-05	-0.1159 to 0.1161	No	ns	>0.9999
AC124798.1:ASO NC vs. AC073487.1:ASO lncRNA	0.2271	0.1111 to 0.3431	Yes	****	<0.0001
AC124798.1:ASO NC vs. AC084855.2:ASO NC	6.767e-05	-0.1159 to 0.1161	No	ns	>0.9999
AC124798.1:ASO NC vs. AC084855.2:ASO lncRNA	0.1085	-0.007475 to 0.2246	No	ns	0.0931
AC124798.1:ASO lncRNA vs. LINC02280:ASO NC	-0.005829	-0.1218 to 0.1102	No	ns	>0.9999
AC124798.1:ASO lncRNA vs. LINC02280:ASO lncRNA	-0.1133	-0.2293 to 0.002705	No	ns	0.0627
AC124798.1:ASO lncRNA vs. AP003352.1:ASO NC	-0.005822	-0.1218 to 0.1102	No	ns	>0.9999
AC124798.1:ASO lncRNA vs. AP003352.1:ASO lncRNA	0.5405	0.4244 to 0.6565	Yes	****	<0.0001
AC124798.1:ASO lncRNA vs. AC073487.1:ASO NC	-0.005752	-0.1218 to 0.1103	No	ns	>0.9999
AC124798.1:ASO lncRNA vs. AC073487.1:ASO lncRNA	0.2213	0.1053 to 0.3373	Yes	****	<0.0001
AC124798.1:ASO lncRNA vs. AC084855.2:ASO NC	-0.005765	-0.1218 to 0.1103	No	ns	>0.9999
AC124798.1:ASO lncRNA vs. AC084855.2:ASO lncRNA	0.1027	-0.01331 to 0.2187	No	ns	0.1504
LINC02280:ASO NC vs. LINC02280:ASO lncRNA	-0.1075	-0.2235 to 0.008534	No	ns	0.1016
LINC02280:ASO NC vs. AP003352.1:ASO NC	7.333e-06	-0.1160 to 0.1160	No	ns	>0.9999
LINC02280:ASO NC vs. AP003352.1:ASO lncRNA	0.5463	0.4303 to 0.6623	Yes	****	<0.0001
LINC02280:ASO NC vs. AC073487.1:ASO NC	7.7e-05	-0.1159 to 0.1161	No	ns	>0.9999
LINC02280:ASO NC vs. AC073487.1:ASO lncRNA	0.2271	0.1111 to 0.3431	Yes	****	<0.0001
LINC02280:ASO NC vs. AC084855.2:ASO NC	6.433e-05	-0.1160 to 0.1161	No	ns	>0.9999
LINC02280:ASO NC vs. AC084855.2:ASO lncRNA	0.1085	-0.007478 to 0.2246	No	ns	0.0931
LINC02280:ASO lncRNA vs. AP003352.1:ASO NC	0.1075	-0.008527 to 0.2235	No	ns	0.1016
LINC02280:ASO lncRNA vs. AP003352.1:ASO lncRNA	0.6538	0.5378 to 0.7698	Yes	****	<0.0001
LINC02280:ASO lncRNA vs. AC073487.1:ASO NC	0.1076	-0.008457 to 0.2236	No	ns	0.101
LINC02280:ASO lncRNA vs. AC073487.1:ASO lncRNA	0.3346	0.2186 to 0.4506	Yes	****	<0.0001
LINC02280:ASO lncRNA vs. AC084855.2:ASO NC	0.1075	-0.008470 to 0.2236	No	ns	0.1011
LINC02280:ASO lncRNA vs. AC084855.2:ASO lncRNA	0.216	0.1000 to 0.3320	Yes	****	<0.0001
AP003352.1:ASO NC vs. AP003352.1:ASO lncRNA	0.5463	0.4303 to 0.6623	Yes	****	<0.0001
AP003352.1:ASO NC vs. AC073487.1:ASO NC	6.967e-05	-0.1159 to 0.1161	No	ns	>0.9999
AP003352.1:ASO NC vs. AC073487.1:ASO lncRNA	0.2271	0.1111 to 0.3431	Yes	****	<0.0001
AP003352.1:ASO NC vs. AC084855.2:ASO NC	5.7e-05	-0.1160 to 0.1161	No	ns	>0.9999
AP003352.1:ASO NC vs. AC084855.2:ASO lncRNA	0.1085	-0.007485 to 0.2245	No	ns	0.0932
AP003352.1:ASO lncRNA vs. AC073487.1:ASO NC	-0.5462	-0.6622 to -0.4302	Yes	****	<0.0001
AP003352.1:ASO lncRNA vs. AC073487.1:ASO lncRNA	-0.3192	-0.4352 to -0.2031	Yes	****	<0.0001
AP003352.1:ASO lncRNA vs. AC084855.2:ASO NC	-0.5462	-0.6622 to -0.4302	Yes	****	<0.0001
AP003352.1:ASO lncRNA vs. AC084855.2:ASO lncRNA	-0.4377	-0.5538 to -0.3217	Yes	****	<0.0001
AC073487.1:ASO NC vs. AC073487.1:ASO lncRNA	0.2271	0.1110 to 0.3431	Yes	****	<0.0001
AC073487.1:ASO NC vs. AC084855.2:ASO NC	-1.267e-05	-0.1160 to 0.1160	No	ns	>0.9999
AC073487.1:ASO NC vs. AC084855.2:ASO lncRNA	0.1085	-0.007555 to 0.2245	No	ns	0.0937
AC073487.1:ASO lncRNA vs. AC084855.2:ASO NC	-0.2271	-0.3431 to -0.1110	Yes	****	<0.0001
AC073487.1:ASO lncRNA vs. AC084855.2:ASO lncRNA	-0.1186	-0.2346 to -0.002575	Yes	*	0.0403
AC084855.2:ASO NC vs. AC084855.2:ASO lncRNA	0.1085	-0.007542 to 0.2245	No	ns	0.0936
Test details	Mean 1	Mean 2	Mean Diff.	SE of diff.	N1	N2	t	DF
AL358332.1:ASO NC vs. AL358332.1:ASO lncRNA	1	0.8894	0.1109	0.03009	3	3	3.687	24
AL358332.1:ASO NC vs. AC124798.1:ASO NC	1	1	5e-05	0.03009	3	3	0.001662	24
AL358332.1:ASO NC vs. AC124798.1:ASO lncRNA	1	0.9944	0.005883	0.03009	3	3	0.1955	24
AL358332.1:ASO NC vs. LINC02280:ASO NC	1	1	5.333e-05	0.03009	3	3	0.001773	24
AL358332.1:ASO NC vs. LINC02280:ASO lncRNA	1	1.108	-0.1074	0.03009	3	3	3.571	24
AL358332.1:ASO NC vs. AP003352.1:ASO NC	1	1	6.067e-05	0.03009	3	3	0.002016	24
AL358332.1:ASO NC vs. AP003352.1:ASO lncRNA	1	0.454	0.5463	0.03009	3	3	18.16	24
AL358332.1:ASO NC vs. AC073487.1:ASO NC	1	1	0.0001303	0.03009	3	3	0.004332	24
AL358332.1:ASO NC vs. AC073487.1:ASO lncRNA	1	0.7731	0.2272	0.03009	3	3	7.551	24
AL358332.1:ASO NC vs. AC084855.2:ASO NC	1	1	0.0001177	0.03009	3	3	0.003911	24
AL358332.1:ASO NC vs. AC084855.2:ASO lncRNA	1	0.8917	0.1086	0.03009	3	3	3.609	24
AL358332.1:ASO lncRNA vs. AC124798.1:ASO NC	0.8894	1	-0.1109	0.03009	3	3	3.686	24
AL358332.1:ASO lncRNA vs. AC124798.1:ASO lncRNA	0.8894	0.9944	-0.1051	0.03009	3	3	3.492	24
AL358332.1:ASO lncRNA vs. LINC02280:ASO NC	0.8894	1	-0.1109	0.03009	3	3	3.686	24
AL358332.1:ASO lncRNA vs. LINC02280:ASO lncRNA	0.8894	1.108	-0.2184	0.03009	3	3	7.258	24
AL358332.1:ASO lncRNA vs. AP003352.1:ASO NC	0.8894	1	-0.1109	0.03009	3	3	3.685	24
AL358332.1:ASO lncRNA vs. AP003352.1:ASO lncRNA	0.8894	0.454	0.4354	0.03009	3	3	14.47	24
AL358332.1:ASO lncRNA vs. AC073487.1:ASO NC	0.8894	1	-0.1108	0.03009	3	3	3.683	24
AL358332.1:ASO lncRNA vs. AC073487.1:ASO lncRNA	0.8894	0.7731	0.1162	0.03009	3	3	3.863	24
AL358332.1:ASO lncRNA vs. AC084855.2:ASO NC	0.8894	1	-0.1108	0.03009	3	3	3.683	24
AL358332.1:ASO lncRNA vs. AC084855.2:ASO lncRNA	0.8894	0.8917	-0.002351	0.03009	3	3	0.07814	24
AC124798.1:ASO NC vs. AC124798.1:ASO lncRNA	1	0.9944	0.005833	0.03009	3	3	0.1939	24
AC124798.1:ASO NC vs. LINC02280:ASO NC	1	1	3.333e-06	0.03009	3	3	0.0001108	24
AC124798.1:ASO NC vs. LINC02280:ASO lncRNA	1	1.108	-0.1075	0.03009	3	3	3.572	24
AC124798.1:ASO NC vs. AP003352.1:ASO NC	1	1	1.067e-05	0.03009	3	3	0.0003545	24
AC124798.1:ASO NC vs. AP003352.1:ASO lncRNA	1	0.454	0.5463	0.03009	3	3	18.16	24
AC124798.1:ASO NC vs. AC073487.1:ASO NC	1	1	8.033e-05	0.03009	3	3	0.00267	24
AC124798.1:ASO NC vs. AC073487.1:ASO lncRNA	1	0.7731	0.2271	0.03009	3	3	7.549	24
AC124798.1:ASO NC vs. AC084855.2:ASO NC	1	1	6.767e-05	0.03009	3	3	0.002249	24
AC124798.1:ASO NC vs. AC084855.2:ASO lncRNA	1	0.8917	0.1085	0.03009	3	3	3.608	24
AC124798.1:ASO lncRNA vs. LINC02280:ASO NC	0.9944	1	-0.005829	0.03009	3	3	0.1937	24
AC124798.1:ASO lncRNA vs. LINC02280:ASO lncRNA	0.9944	1.108	-0.1133	0.03009	3	3	3.766	24
AC124798.1:ASO lncRNA vs. AP003352.1:ASO NC	0.9944	1	-0.005822	0.03009	3	3	0.1935	24
AC124798.1:ASO lncRNA vs. AP003352.1:ASO lncRNA	0.9944	0.454	0.5405	0.03009	3	3	17.96	24
AC124798.1:ASO lncRNA vs. AC073487.1:ASO NC	0.9944	1	-0.005752	0.03009	3	3	0.1912	24
AC124798.1:ASO lncRNA vs. AC073487.1:ASO lncRNA	0.9944	0.7731	0.2213	0.03009	3	3	7.355	24
AC124798.1:ASO lncRNA vs. AC084855.2:ASO NC	0.9944	1	-0.005765	0.03009	3	3	0.1916	24
AC124798.1:ASO lncRNA vs. AC084855.2:ASO lncRNA	0.9944	0.8917	0.1027	0.03009	3	3	3.414	24
LINC02280:ASO NC vs. LINC02280:ASO lncRNA	1	1.108	-0.1075	0.03009	3	3	3.572	24
LINC02280:ASO NC vs. AP003352.1:ASO NC	1	1	7.333e-06	0.03009	3	3	0.0002437	24
LINC02280:ASO NC vs. AP003352.1:ASO lncRNA	1	0.454	0.5463	0.03009	3	3	18.16	24
LINC02280:ASO NC vs. AC073487.1:ASO NC	1	1	7.7e-05	0.03009	3	3	0.002559	24
LINC02280:ASO NC vs. AC073487.1:ASO lncRNA	1	0.7731	0.2271	0.03009	3	3	7.549	24
LINC02280:ASO NC vs. AC084855.2:ASO NC	1	1	6.433e-05	0.03009	3	3	0.002138	24
LINC02280:ASO NC vs. AC084855.2:ASO lncRNA	1	0.8917	0.1085	0.03009	3	3	3.607	24
LINC02280:ASO lncRNA vs. AP003352.1:ASO NC	1.108	1	0.1075	0.03009	3	3	3.573	24
LINC02280:ASO lncRNA vs. AP003352.1:ASO lncRNA	1.108	0.454	0.6538	0.03009	3	3	21.73	24
LINC02280:ASO lncRNA vs. AC073487.1:ASO NC	1.108	1	0.1076	0.03009	3	3	3.575	24
LINC02280:ASO lncRNA vs. AC073487.1:ASO lncRNA	1.108	0.7731	0.3346	0.03009	3	3	11.12	24
LINC02280:ASO lncRNA vs. AC084855.2:ASO NC	1.108	1	0.1075	0.03009	3	3	3.574	24
LINC02280:ASO lncRNA vs. AC084855.2:ASO lncRNA	1.108	0.8917	0.216	0.03009	3	3	7.18	24
AP003352.1:ASO NC vs. AP003352.1:ASO lncRNA	1	0.454	0.5463	0.03009	3	3	18.16	24
AP003352.1:ASO NC vs. AC073487.1:ASO NC	1	1	6.967e-05	0.03009	3	3	0.002316	24
AP003352.1:ASO NC vs. AC073487.1:ASO lncRNA	1	0.7731	0.2271	0.03009	3	3	7.549	24
AP003352.1:ASO NC vs. AC084855.2:ASO NC	1	1	5.7e-05	0.03009	3	3	0.001895	24
AP003352.1:ASO NC vs. AC084855.2:ASO lncRNA	1	0.8917	0.1085	0.03009	3	3	3.607	24
AP003352.1:ASO lncRNA vs. AC073487.1:ASO NC	0.454	1	-0.5462	0.03009	3	3	18.15	24
AP003352.1:ASO lncRNA vs. AC073487.1:ASO lncRNA	0.454	0.7731	-0.3192	0.03009	3	3	10.61	24
AP003352.1:ASO lncRNA vs. AC084855.2:ASO NC	0.454	1	-0.5462	0.03009	3	3	18.15	24
AP003352.1:ASO lncRNA vs. AC084855.2:ASO lncRNA	0.454	0.8917	-0.4377	0.03009	3	3	14.55	24
AC073487.1:ASO NC vs. AC073487.1:ASO lncRNA	1	0.7731	0.2271	0.03009	3	3	7.546	24
AC073487.1:ASO NC vs. AC084855.2:ASO NC	1	1	-1.267e-05	0.03009	3	3	0.000421	24
AC073487.1:ASO NC vs. AC084855.2:ASO lncRNA	1	0.8917	0.1085	0.03009	3	3	3.605	24
AC073487.1:ASO lncRNA vs. AC084855.2:ASO NC	0.7731	1	-0.2271	0.03009	3	3	7.547	24
AC073487.1:ASO lncRNA vs. AC084855.2:ASO lncRNA	0.7731	0.8917	-0.1186	0.03009	3	3	3.942	24
AC084855.2:ASO NC vs. AC084855.2:ASO lncRNA	1	0.8917	0.1085	0.03009	3	3	3.605	24
