# Supplementary material for: AP003352.1/miR-141-3p axis enhances the proliferation of osteosarcoma by LPAR3
Source: PeerJ journal article supplement (doi:10.7717/peerj.15937), 2023-09-15

Figure4E

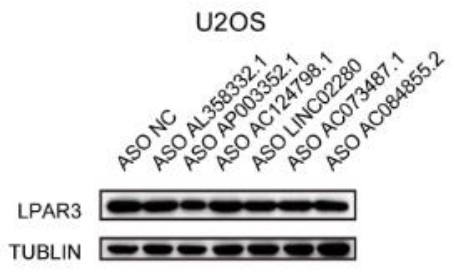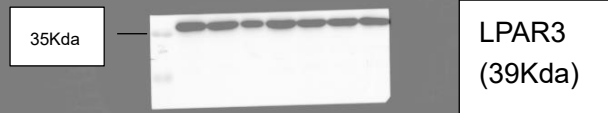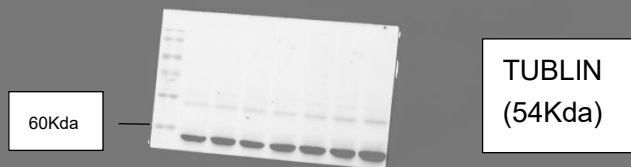

Figure6A

U2OS  
ASO NC  
ASO AP003882.1

LPAR3 

TUBLIN 

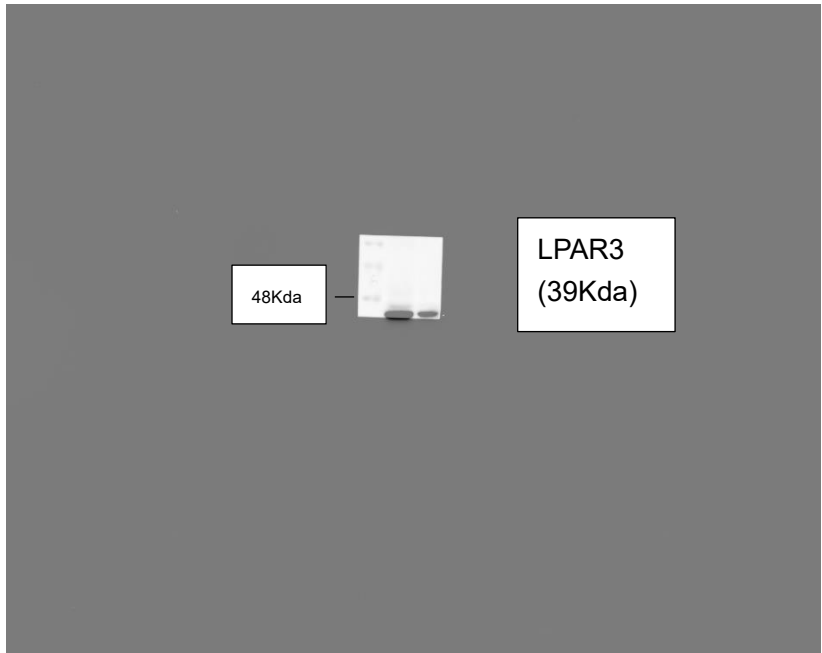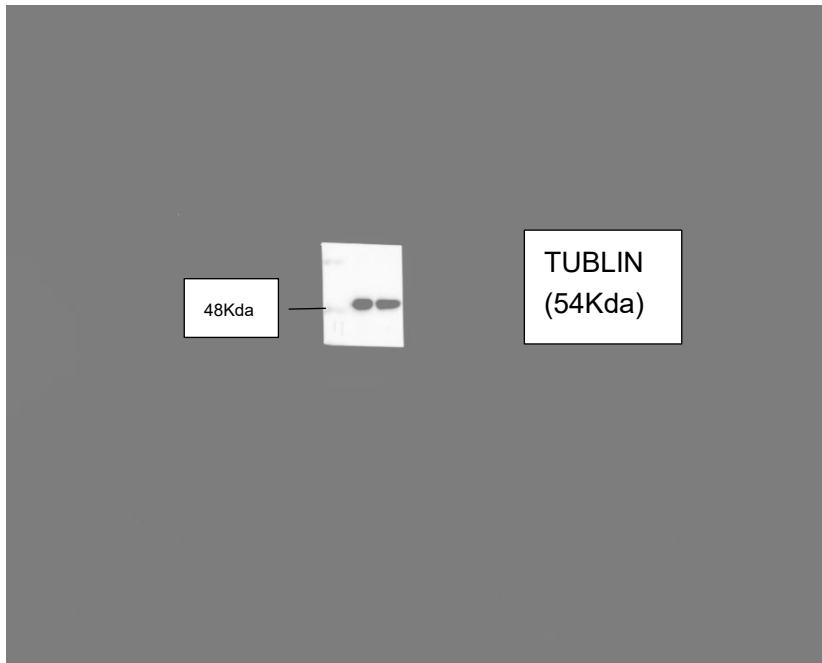

Figure6B

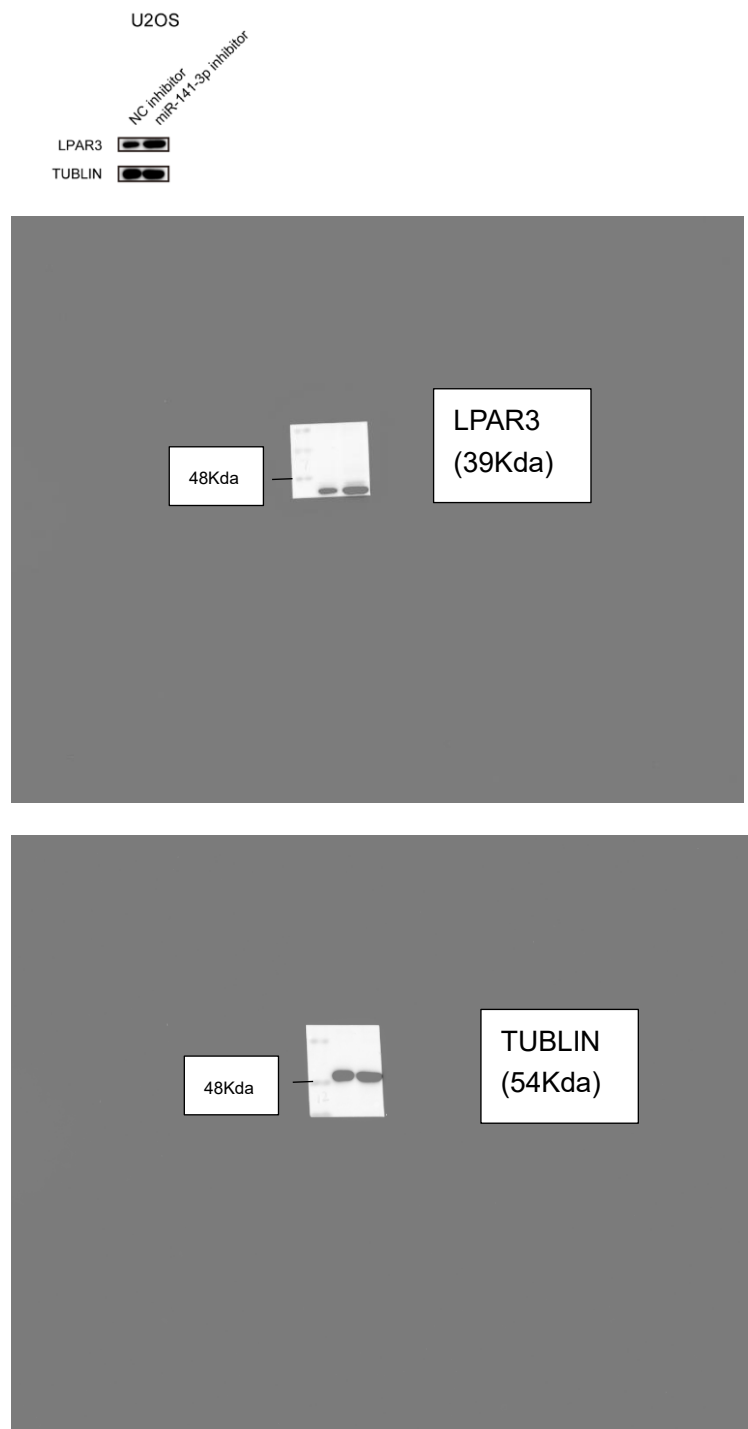

Figure6C

U2OS  
NC Mimic  
miR-141-3p Mimic

LPAR3   
TUBLIN 

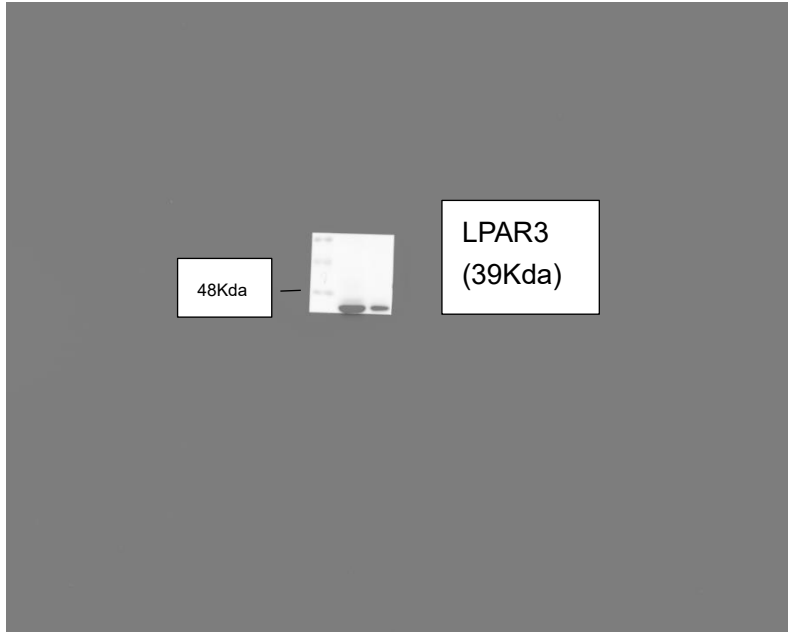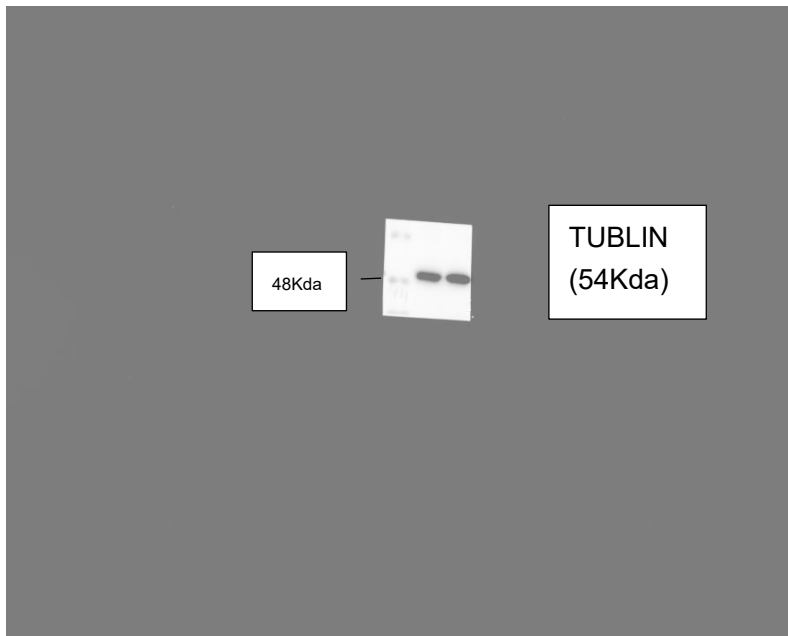

Supplement: Original_western_blots.pdf [file Original_western_blots.pdf]
